# Supplementary material for: Precision immuno-oncology approach for four malignant tumors in siblings with constitutional mismatch repair deficiency syndrome
Source: PubMed Central journal article supplement (PMC11109258; doi:10.1038/s41698-024-00597-8), 2024-05-21
Supplement: 41698_2024_597_MOESM2_ESM.pdf [file 41698_2024_597_MOESM2_ESM.pdf]

## SUPPLEMENTARY DATA

### 1. Additional analyses of whole-exome sequencing (WES) and RNA sequencing data

#### 1.1 HLA-typing

The methodology was previously described in Das *et al* (1). Paired end fastq files from matched germline WES data were used as input to computationally determine HLA (human leukocyte antigen) Class-I types for 39 tumors using a consensus of HLAmminer(2), and HLA VBSeq(3), as described and validated before (4). The top 6 HLA-types were used as input for neoantigen calling as described below.

#### 1.2 Neoantigen calling

The methodology was previously described in Das *et al* (1). The Mutect2 vcfs generated for each tumor (described above) were used as input along with bioinformatically generated HLA-types (above) for MuPeXI (5), to get a list of strong binding candidate neoantigens per HLA-type. This uses netMHCpan (6) (to calculate all variant peptides ranging from 8–12 mer, and total candidate neoantigens was determined by selecting all neoantigens that showed '%rank' < 0.5 binding affinity, denoting all strong binders (as recommended by the netMHCpan user manual). It is to be noted that all candidate neoantigens were restricted to class-I MHC proteins only.

#### 1.3 Neoantigens from coding microsatellites

The methodology was previously described in Das *et al* (1). Microsatellite indels were called using MSMuTect v1.0 (7). The Indels were annotated using the Ensembl Variant Effect Predictor71 (VEP release/104.2). Neoantigens were identified using pVAC-seq78 software suite. Using NetMHCpan4.1 (8) algorithm (included in pVAC-seq), we predicted 8- and 9-mer neoantigens with strong binding affinity (score ≤ 500 nM) to the patients' HLA class I (A, B, or C).

### 1.4 Analysis of mechanisms related to immune evasion in Patient 1

#### 1.4.1 HLA-typing

Analysis of germline WES data revealed that both brothers have the same HLA-A alleles: HLA-A31:01 and HLA-A02:01. Both of these alleles were also detected in patients' tumors. Therefore, we haven't identified evidence of loss of heterozygosity in HLA alleles from WES data.

#### 1.4.2 Detection of variants in genes related to immune evasion

Analysis of JAK/STAT pathway genes including *JAK1*, *STAT1*, *IFNGR1*, *JAK2*, *STAT5A*, *STAT5B* and *TYK2* revealed a previously unreported nonsense variant c.3163C>T/p.Q1055\* in the *JAK1* gene which was detected at both time-points. Variant has not been described and functionally characterized before, therefore its effect on protein function is not known. However, the presence of this mutation did not impact clinical response at initial treatment. Variant frequency in the initial biopsy (2017) is 22% and 14% in the recurrence (2019), suggesting this variant has no role in immune evasion.

### 1.4.3 Neoantigen analysis

Candidate neoantigens were identified by combined analysis of WES and RNA sequencing data. 3575 immunogenic neoantigens in the 2017 biopsy and 4871 in the 2019 biopsy were identified demonstrating that many more neoantigens are present in the later sample. Focusing on the 100 most immunogenic neoantigens shared in both biopsies and their expression comparison revealed that no overall expression change pattern was identified between biopsies 2017 and 2019 as showed in the following figure.

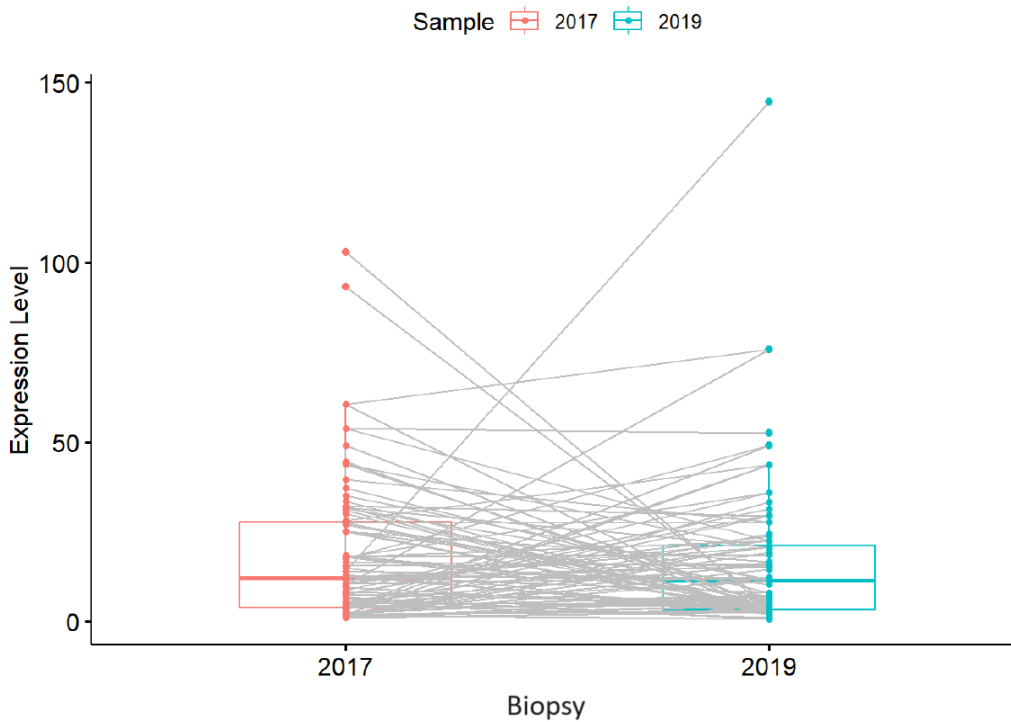

**Supplementary Figure 1:** Dynamics of expression of the 100 most immunogenic neoantigens in both Patient 1’s pediatric-type diffuse high-grade glioma biopsies.

The table below lists the 100 most immunogenic neoantigens shared in both biopsies.

**Supplementary Table 1:** Top neoantigens in both Patient 1’s pediatric-type diffuse high-grade glioma biopsies.

| HLA allele | Neoantigen | Expression level 2017 | Expression level 2019 | Priority score 2017 | Priority score 2019 |
|------------|------------|-----------------------|-----------------------|---------------------|---------------------|
| HLA-A31:01 | GSLFFLFKR  | 49.09523              | 49.02984              | 87                  | 87                  |
| HLA-A31:01 | SSLFFLIQR  | 43.9864               | 43.697                | 81                  | 84                  |
| HLA-A02:01 | SLFFLIQRV  | 43.9864               | 43.697                | 71                  | 74                  |
| HLA-A31:01 | KARGTDSPR  | 17.8204262            | 27.81636              | 66                  | 39                  |
| HLA-A31:01 | FAAPSPRWAR | 17.8204262            | 27.81636              | 66                  | 39                  |
| HLA-A31:01 | SLSEKKCLR  | 5.24640467            | 3.945476              | 66                  | 68                  |
| HLA-A02:01 | FLFKRISSV  | 49.09523              | 49.02984              | 65                  | 65                  |

| HLA allele | Neoantigen   | Expression level 2017 | Expression level 2019 | Priority score 2017 | Priority score 2019 |
|------------|--------------|-----------------------|-----------------------|---------------------|---------------------|
| HLA-A31:01 | KLLRLVDNR    | 13.8691               | 4.50273               | 64                  | 75                  |
| HLA-A02:01 | FLIQRVWSL    | 43.9864               | 43.697                | 61                  | 63                  |
| HLA-A02:01 | GLPDPKTLLL   | 5.118662              | 7.1146                | 60                  | 56                  |
| HLA-A02:01 | FLLYRLPTV    | 0.942046038           | 0.633146934           | 60                  | 49                  |
| HLA-A31:01 | SWNSNFLFR    | 0.942046038           | 0.633146934           | 58                  | 47                  |
| HLA-A31:01 | AAPSPRWAR    | 17.8204262            | 27.81636              | 57                  | 33                  |
| HLA-A02:01 | KLHVPLPPRV   | 53.7786               | 12.2182               | 57                  | 22                  |
| HLA-A02:01 | TLHHRIWQA    | 2.46111               | 1.823963              | 56                  | 44                  |
| HLA-A31:01 | AGREGQSQR    | 2.227154721           | 4.6566874             | 55                  | 37                  |
| HLA-A02:01 | LLVPAGFLL    | 93.392331             | 19.158303             | 55                  | 36                  |
| HLA-A31:01 | NAFEHIFTR    | 31.71959              | 33.46441              | 54                  | 28                  |
| HLA-A31:01 | KSWVYPSIR    | 0.942046038           | 0.633146934           | 52                  | 43                  |
| HLA-A02:01 | SMSSGLLNL    | 5.31281               | 6.68775               | 51                  | 51                  |
| HLA-A31:01 | SVFRETPPR    | 31.9526               | 35.9539               | 50                  | 61                  |
| HLA-A31:01 | SSWTGSRASR   | 25.008712             | 20.746814             | 50                  | 44                  |
| HLA-A31:01 | KAHRNKIGR    | 11.62736              | 12.08026              | 48                  | 48                  |
| HLA-A02:01 | KLFEVTRHRM   | 5.52756               | 7.129783              | 47                  | 46                  |
| HLA-A02:01 | HLLIWNPLGV   | 7.454681              | 20.7145339            | 47                  | 41                  |
| HLA-A02:01 | WMLPGVMTF    | 2.0351                | 2.23169               | 47                  | 36                  |
| HLA-A02:01 | RLDYLINV     | 13.94588              | 14.4022               | 47                  | 23                  |
| HLA-A02:01 | KRLYEFFNEL   | 18.2767               | 15.5721               | 46                  | 43                  |
| HLA-A31:01 | SSRGSKSRR    | 12.695568             | 11.224904             | 46                  | 43                  |
| HLA-A02:01 | RISAKLFTV    | 4.66696               | 2.64528               | 46                  | 43                  |
| HLA-A02:01 | RQNEHIWWL    | 10.60225              | 4.709309639           | 44                  | 44                  |
| HLA-A02:01 | YLKSELSFL    | 4.000155658           | 2.66120419            | 44                  | 42                  |
| HLA-A02:01 | QMRFDGPLHI   | 5.067674              | 11.596717             | 43                  | 28                  |
| HLA-A02:01 | QLYSKVINV    | 39.55090248           | 22.31725155           | 43                  | 52                  |
| HLA-A02:01 | RQLYSKVINV   | 39.55090248           | 22.31725155           | 43                  | 52                  |
| HLA-A31:01 | LTMAEYFFR    | 27.4891               | 11.688924             | 43                  | 43                  |
| HLA-A02:01 | RLQPIVESV    | 1.31684               | 0.93178964            | 43                  | 35                  |
| HLA-A31:01 | KLHVPLPPR    | 53.7786               | 12.2182               | 43                  | 16                  |
| HLA-A31:01 | NQKKPFFGR    | 12.47263273           | 4.328611423           | 42                  | 44                  |
| HLA-A31:01 | RNQQKPPFFGR  | 12.47263273           | 4.328611423           | 42                  | 44                  |
| HLA-A02:01 | YQHAGLMAL    | 18.1273               | 15.2668               | 42                  | 41                  |
| HLA-A02:01 | KLLHPKDQEVFL | 12.9118               | 1.39511               | 42                  | 39                  |
| HLA-A02:01 | NMLTLPEEL    | 25.06                 | 20.29875              | 41                  | 48                  |
| HLA-A02:01 | LIWNPPPLGV   | 7.454681              | 20.7145339            | 41                  | 36                  |
| HLA-A02:01 | LLIWNPPPLGV  | 7.454681              | 20.7145339            | 41                  | 36                  |
| HLA-A31:01 | TMAEYFFRK    | 27.4891               | 11.688924             | 41                  | 41                  |
| HLA-A31:01 | HTQALWNAR    | 2.0351                | 2.23169               | 41                  | 31                  |
| HLA-A31:01 | VFFDNKNSGR   | 30.97225              | 29.716343             | 41                  | 34                  |
| HLA-A31:01 | KSYILTNR     | 30.082449             | 31.379433             | 41                  | 28                  |
| HLA-A31:01 | KFGELEGTR    | 9.3732                | 15.36115              | 41                  | 33                  |
| HLA-A31:01 | KFEQGSHER    | 9.3732                | 15.36115              | 41                  | 33                  |
| HLA-A02:01 | ILASYGNAI    | 33.522442             | 29.5772255            | 41                  | 42                  |

| HLA allele | Neoantigen  | Expression level 2017 | Expression level 2019 | Priority score 2017 | Priority score 2019 |
|------------|-------------|-----------------------|-----------------------|---------------------|---------------------|
| HLA-A31:01 | AIVITINYR   | 33.522442             | 29.5772255            | 41                  | 42                  |
| HLA-A02:01 | LQFAESFEV   | 103.0627              | 144.8716              | 40                  | 44                  |
| HLA-A31:01 | NFISFRNTR   | 27.06509              | 16.35525              | 40                  | 64                  |
| HLA-A02:01 | SVLSGVIKI   | 1.59568               | 6.11664               | 40                  | 37                  |
| HLA-A02:01 | ILGWGVENV   | 44.49399115           | 52.52192001           | 40                  | 29                  |
| HLA-A31:01 | RVRPLPAQR   | 1.94556               | 3.17917               | 40                  | 54                  |
| HLA-A31:01 | ALAPAPARR   | 1.94556               | 3.17917               | 40                  | 54                  |
| HLA-A31:01 | AQRGRPAHR   | 1.94556               | 3.17917               | 40                  | 54                  |
| HLA-A31:01 | RALPPPLLVR  | 1.94556               | 3.17917               | 40                  | 54                  |
| HLA-A31:01 | RVRPLPAQRGR | 1.94556               | 3.17917               | 40                  | 54                  |
| HLA-A31:01 | HSLPGPGRR   | 1.94556               | 3.17917               | 40                  | 54                  |
| HLA-A31:01 | AAHVPQTVR   | 1.94556               | 3.17917               | 40                  | 54                  |
| HLA-A31:01 | RAQPRPQQHR  | 1.94556               | 3.17917               | 40                  | 54                  |
| HLA-A31:01 | RAHPPGQLLGR | 1.94556               | 3.17917               | 40                  | 54                  |
| HLA-A02:01 | TLMTEFSKL   | 1.977904726           | 2.037551074           | 40                  | 44                  |
| HLA-A31:01 | RTPMFPQFR   | 14.74243              | 15.857494             | 40                  | 40                  |
| HLA-A31:01 | ALEGKWKYKR  | 10.60225              | 4.709309639           | 39                  | 39                  |
| HLA-A31:01 | RTMVEAAFGR  | 10.60225              | 4.709309639           | 39                  | 39                  |
| HLA-A31:01 | TMVEAAFGR   | 10.60225              | 4.709309639           | 39                  | 39                  |
| HLA-A02:01 | AVYSSTVGL   | 16.43635              | 16.60498              | 39                  | 40                  |
| HLA-A31:01 | KQKANSTKR   | 11.29083              | 7.272620022           | 39                  | 39                  |
| HLA-A02:01 | LLSSVASLV   | 3.35795               | 3.21611               | 39                  | 36                  |
| HLA-A31:01 | QLPGARVRR   | 1.94556               | 3.17917               | 39                  | 54                  |
| HLA-A31:01 | SQTNCRLSR   | 3.96189               | 2.95288               | 39                  | 36                  |
| HLA-A02:01 | IVSIDIPLV   | 3.209592              | 4.935202001           | 38                  | 25                  |
| HLA-A31:01 | YFFRKWCKR   | 27.4891               | 11.688924             | 38                  | 38                  |
| HLA-A02:01 | NLFLQPPQI   | 17.3101               | 23.5981               | 38                  | 29                  |
| HLA-A31:01 | AMMDKNADR   | 28.2576               | 18.56425              | 38                  | 34                  |
| HLA-A02:01 | KMPFQVEQV   | 6.33516               | 5.35319               | 38                  | 24                  |
| HLA-A02:01 | NLWPGDLLA   | 1.570771779           | 3.98768741            | 38                  | 39                  |
| HLA-A31:01 | SWGSRASR    | 25.008712             | 20.746814             | 38                  | 33                  |
| HLA-A31:01 | RGQARRPRR   | 31.9526               | 35.9539               | 37                  | 45                  |
| HLA-A02:01 | IYLMSDSPNI  | 6.661101407           | 6.95973968            | 37                  | 41                  |
| HLA-A02:01 | TLAATSTAV   | 32.317371             | 24.2570553            | 37                  | 29                  |
| HLA-A02:01 | KLIKKQHLV   | 3.736280507           | 5.427739108           | 37                  | 30                  |
| HLA-A31:01 | ASCWRSRTR   | 25.008712             | 20.746814             | 37                  | 33                  |
| HLA-A02:01 | SQWRPVVQV   | 15.52077              | 2.885929              | 37                  | 49                  |
| HLA-A31:01 | RLAPFFER    | 37.30366232           | 22.27544347           | 37                  | 37                  |
| HLA-A31:01 | SQHPSPLKR   | 12.5651               | 10.21                 | 37                  | 42                  |
| HLA-A02:01 | FILANHLYPV  | 60.41324              | 75.74959              | 37                  | 33                  |
| HLA-A02:01 | ILANHLYPV   | 60.41324              | 75.74959              | 37                  | 33                  |
| HLA-A31:01 | GEVMGPQIPR  | 9.976061              | 7.95685               | 37                  | 39                  |
| HLA-A31:01 | EVMGPQIPR   | 9.976061              | 7.95685               | 37                  | 39                  |
| HLA-A02:01 | SLAKNTCYL   | 1.97737               | 2.48946               | 36                  | 33                  |

### 1.5 Analysis of shared variants in both patients' tumors

The following figure shows shared variants in both patients' tumors identified by additional analysis of the WES data.

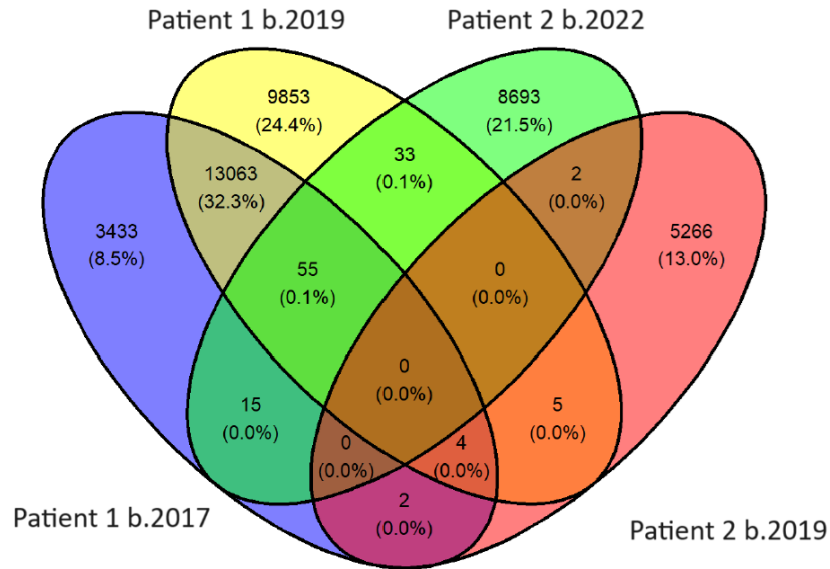

**Supplementary Figure 2:** Shared variants between patients and their tumors.

We can see 55 mutations shared between patients' pediatric-type diffuse high-grade glioma tumors. Only one of is considered to have a high impact on protein encoded by this gene these (splicing variant c.3+2T>C in the *ISG15* gene). None of these shared variants have been previously described or functionally characterized. Germline pathogenic mutations in the *ISG15* gene are associated with immunodeficiency (autosomal recessive inheritance) (omim.org). Its immunoregulatory role has also been studied in cancer (9) and could possibly represent a potential shared target, if such therapy was available.

## 2. RNA sequencing - gene expression profiling

**Supplementary Table 2:** Increased gene expressions of selected clinically relevant genes examined by RNA sequencing identified in Patient 1' s tumors.

| Signaling pathway                                | Gene          | Protein                                       | FC   | Graphical representation | Score |
|--------------------------------------------------|---------------|-----------------------------------------------|------|--------------------------|-------|
| <b>Colorectal carcinoma</b>                      |               |                                               |      |                          |       |
| Receptor tyrosine kinase/growth factor signaling | <i>ERBB3</i>  | Receptor tyrosine-protein kinase erbB-3       | 3.31 | ++++                     | 1     |
|                                                  | <i>FGFR4</i>  | Fibroblast growth factor receptor 4           | 2.89 | ++++                     | 1     |
|                                                  | <i>MET</i>    | Hepatocyte growth factor receptor             | 2.16 | +++                      | 1     |
|                                                  | <i>ROS1</i>   | Proto-oncogene tyrosine-protein kinase ROS    | 2.09 | +++                      | 2     |
|                                                  | <i>VEGFA</i>  | Vascular endothelial growth factor A          | 1.88 | +++                      | 1     |
| Cell cycle control                               | <i>CCND1</i>  | G1/S-specific cyclin-D1                       | 2.11 | +++                      | 3     |
| Chromatin remodeling/DNA methylation             | <i>TERT</i>   | Telomerase reverse transcriptase              | 4.45 | +++++                    | 4     |
| <b>PDHGG (biopsy 2017)</b>                       |               |                                               |      |                          |       |
| Receptor tyrosine kinase/growth factor signaling | <i>PDGFRA</i> | Platelet-derived growth factor receptor alpha | 5.33 | +++++                    | 1     |
|                                                  | <i>KDR</i>    | Vascular endothelial growth factor receptor 2 | 2.64 | ++++                     | 2     |
|                                                  | <i>FLT4</i>   | Vascular endothelial growth factor receptor 3 | 2.24 | ++++                     | 2     |
|                                                  | <i>ERBB3</i>  | Receptor tyrosine-protein kinase erbB-3       | 2.17 | ++++                     | 2     |
|                                                  | <i>PDGFRB</i> | Platelet-derived growth factor receptor beta  | 1.98 | +++                      | 1     |
| Cell cycle control                               | <i>CCND1</i>  | G1/S-specific cyclin-D1                       | 4.66 | +++++                    | 3     |
|                                                  | <i>MYC</i>    | Myc proto-oncogene protein                    | 3.54 | +++++                    | 4     |
| <b>PDHGG (biopsy 2019)</b>                       |               |                                               |      |                          |       |
| Receptor tyrosine kinase/growth factor signaling | <i>VEGFA</i>  | Vascular endothelial growth factor A          | 5.81 | +++++                    | 2     |
|                                                  | <i>PDGFRA</i> | Platelet-derived growth factor receptor alpha | 4.35 | +++++                    | 1     |
|                                                  | <i>ERBB3</i>  | Receptor tyrosine-protein kinase erbB-3       | 2.77 | ++++                     | 2     |
|                                                  | <i>ALK</i>    | ALK tyrosine kinase receptor                  | 2.76 | ++++                     | 2     |
| Cell cycle control                               | <i>MYC</i>    | Myc proto-oncogene protein                    | 2.91 | ++++                     | 4     |
|                                                  | <i>CCND1</i>  | G1/S-specific cyclin-D1                       | 2.86 | ++++                     | 3     |

Score classification details (modified based on Worst *et al* (10): **Score 1:** Overexpressed driver, entity-specific; description: overexpression of a directly targetable gene known to be a driver in specific entity); example: overexpression of *PDGFR/EGFR/FGFR* etc. in HGG. **Score 2:** Overexpressed driver, entity other; description: overexpression of a directly targetable gene known to be a driver in another entity; example: overexpression of *EGFR/MET/VEGFR* etc. in an entity where this is not typically seen. **Score 3:** Pathway activation, expression, entity any; description: expression changes clearly indicating activation of a potentially actionable pathway/genes; example: MAPK pathway activation; SHH pathway activation, *CCND1, CDK4* overexpression. **Score 4:** *MYC, TERT* overexpression (not targetable, associated with cancer prognosis). High and/or aberrant Myc expression is related to poor prognosis and aggressive conditions (11). *TERT* transcription and telomerase activity contribute to cancer development and progression (12). Abbreviations: PDHGG, pediatric-type diffuse high-grade glioma; HGG, high-grade glioma; MAPK, Mitogen-Activated Protein Kinase; SHH, Sonic Hedgehog.

**Supplementary Table 3:** Increased gene expressions of selected clinically relevant genes examined by RNA sequencing identified in Patient 2's tumors.

| Signaling pathway                                | Gene          | Protein                                       | FC   | Graphical representation | Score |
|--------------------------------------------------|---------------|-----------------------------------------------|------|--------------------------|-------|
| <b>HGBL-11q</b>                                  |               |                                               |      |                          |       |
| Chromatin remodeling/DNA methylation             | <i>TERT</i>   | Telomerase reverse transcriptase              | 8.61 | +++++                    | 4     |
| <b>PDHGG</b>                                     |               |                                               |      |                          |       |
| Receptor tyrosine kinase/growth factor signaling | <i>PDGFRA</i> | Platelet-derived growth factor receptor alpha | 4.74 | +++++                    | 1     |
|                                                  | <i>FLT4</i>   | Vascular endothelial growth factor receptor 3 | 2.41 | ++++                     | 2     |
|                                                  | <i>KDR</i>    | Vascular endothelial growth factor receptor 2 | 1.89 | ++++                     | 2     |
| Cell cycle control                               | <i>CCND1</i>  | G1/S-specific cyclin-D1                       | 3.92 | +++++                    | 3     |
|                                                  | <i>MYC</i>    | Myc proto-oncogene protein                    | 2.55 | ++++                     | 4     |
|                                                  | <i>CDK4</i>   | Cyclin-dependent kinase 4                     | 1.96 | ++++                     | 3     |

Score classification details (modified based on Worst *et al* (10): **Score 1:** Overexpressed driver, entity-specific; description: overexpression of a directly targetable gene known to be a driver in the specific entity); example: overexpression of *PDGFR/EGFR/FGFR*, etc. in HGG. **Score 2:** Overexpressed driver, an entity other; description: overexpression of a directly targetable gene known to be a driver in another entity; example: overexpression of *EGFR/MET/VEGFR*, etc. in an entity where this is not typically seen. **Score 3:** Pathway activation, expression, entity any; description: expression changes clearly indicating activation of a potentially actionable pathway/genes; example: MAPK pathway activation; SHH pathway activation, *CCND1, CDK4* overexpression. **Score 4:** *MYC, TERT* overexpression (not targetable, associated with cancer prognosis). High and/or aberrant Myc expression is related to poor prognosis and aggressive conditions (11). *TERT* transcription and telomerase activity contributes to cancer development and progression (12).

Abbreviations: HGBL-11q, high-grade B-cell lymphoma with 11q aberrations; PDHGG, pediatric-type diffuse high-grade glioma; HGG, high-grade glioma; MAPK, Mitogen-Activated Protein Kinase; SHH, Sonic Hedgehog.

### 3. Microarray-based comparative genomic hybridization (array-CGH)

**Supplementary Table 4:** Summary of chromosomal aberrations identified by array-CGH in both patients' tumors.

| Patient and sample                  | Chromosome    | Detected aberration          |
|-------------------------------------|---------------|------------------------------|
| Patient 1<br>PDHGG<br>(biopsy 2019) | 2             | Loss of the whole chromosome |
|                                     | 8             | 8q22.1-q22.3 loss            |
|                                     | 8             | 8q24.13-q24.21 loss          |
|                                     | 10            | 10q11.21-q26.3 loss          |
|                                     | 13            | Loss of the whole chromosome |
|                                     | 15            | Loss of the whole chromosome |
|                                     | 16            | 16q11.21-q26.3 loss          |
|                                     | 21            | Gain of the whole chromosome |
|                                     | 22            | Loss of the whole chromosome |
| X                                   | Xq23-q28 loss |                              |
| Patient 2<br>HGBL-11q               | 1             | 1p36.33-p32.1 LOH            |
|                                     | 3             | 3q26.33-q28 gain             |
|                                     | 3             | 3q28-q29 loss                |
|                                     | 3             | 3q29 amplification           |
|                                     | 7             | 7q11.21-q36.3 gain           |
|                                     | 11            | 11q23.2-q23.3 gain           |
|                                     | 11            | 11q q23.3-q25 loss           |
|                                     | 18            | 18p loss                     |
| Patient 2<br>PDHGG                  | 1             | 1q loss                      |
|                                     | 2             | 2p loss                      |
|                                     | 4             | 4p16.3-p15.31 loss           |
|                                     | 7             | 7 p22.3-p21.2 loss           |
|                                     | 7             | 7 p21.1-p15.3 gain           |
|                                     | 7             | 7q loss                      |
|                                     | 10            | 10q21.1-q26.3 loss           |
|                                     | 13            | 13q14.11-q34 loss            |
|                                     | 17            | 17q21.33-q25.3 gain          |
|                                     | 17            | 17q22-q24.1 LOH              |

Abbreviations: PDHGG - pediatric-type diffuse high-grade glioma; HGBL-11q - high-grade B-cell lymphoma with 11q aberrations; CGH - comparative genomic hybridization; LOH – loss of heterozygosity.



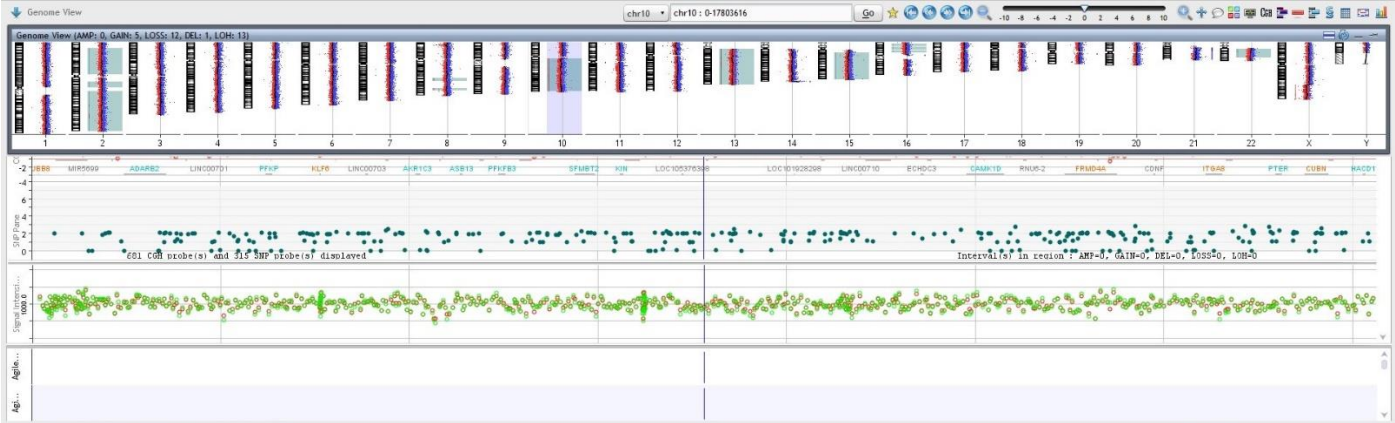

**Supplementary Figure 3:** Chromosomal aberrations identified in Patient 1's PDHGG (biopsy 2019) using array-CGH visualized in CytoGenomics software (Agilent).  
 Abbreviations: PDHGG, pediatric-type diffuse high-grade glioma; CGH, comparative genomic hybridization.

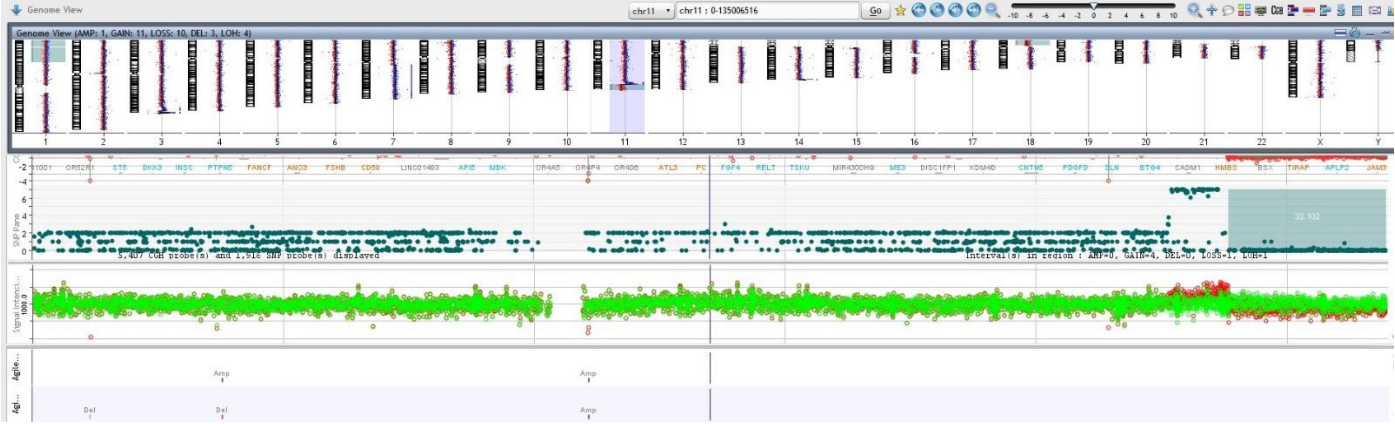

**Supplementary Figure 4:** Chromosomal aberrations identified in the Patient 2's HGBL-11q using array-CGH visualized in CytoGenomics software (Agilent). Aberrations affecting chromosome 11 are shown separately in Fig.2B.  
 Abbreviations: HGBL-11q - high-grade B-cell lymphoma with 11q aberrations; CGH - comparative genomic hybridization.

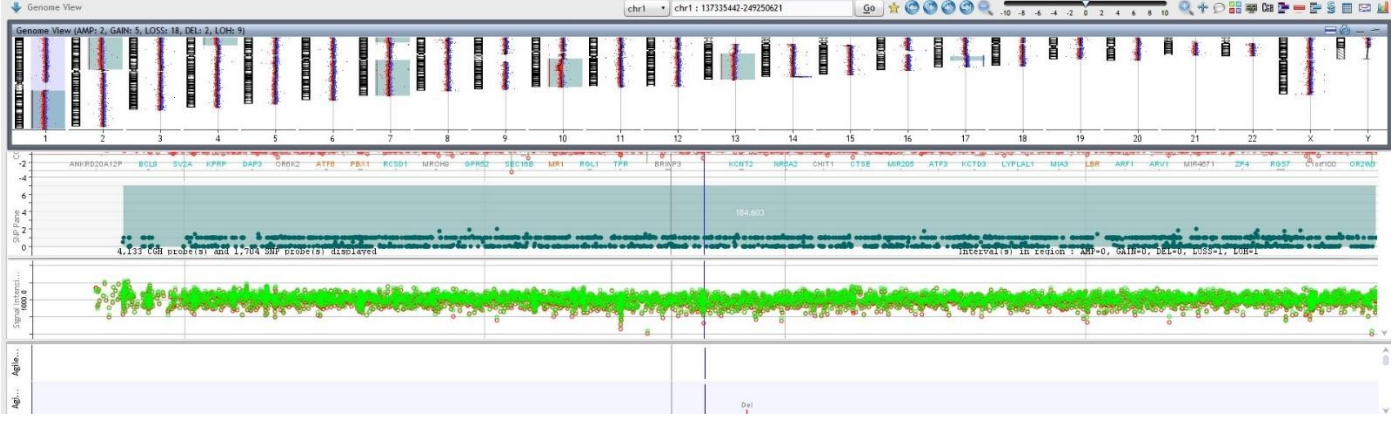

**Supplementary Figure 5:** Chromosomal aberrations identified in the Patient 2's PDHGG using array-CGH visualized in CytoGenomics software (Agilent).

Abbreviations: PDHGG - pediatric-type diffuse high-grade glioma; CGH - comparative genomic hybridization.

a

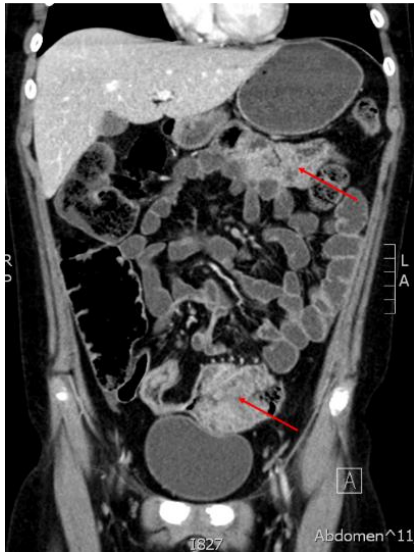

CT at the time of colorectal carcinoma diagnosis

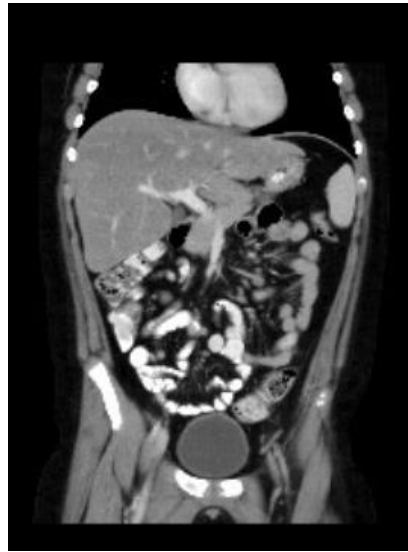

CT at the end of colorectal carcinoma treatment

b

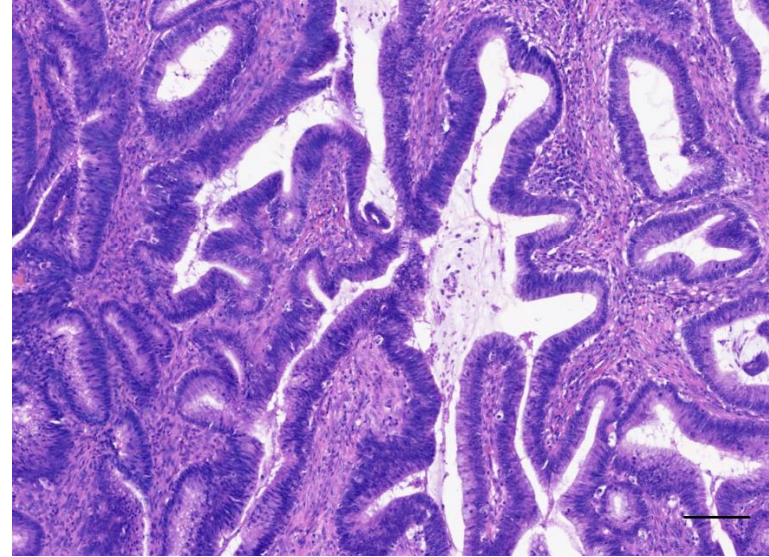

c

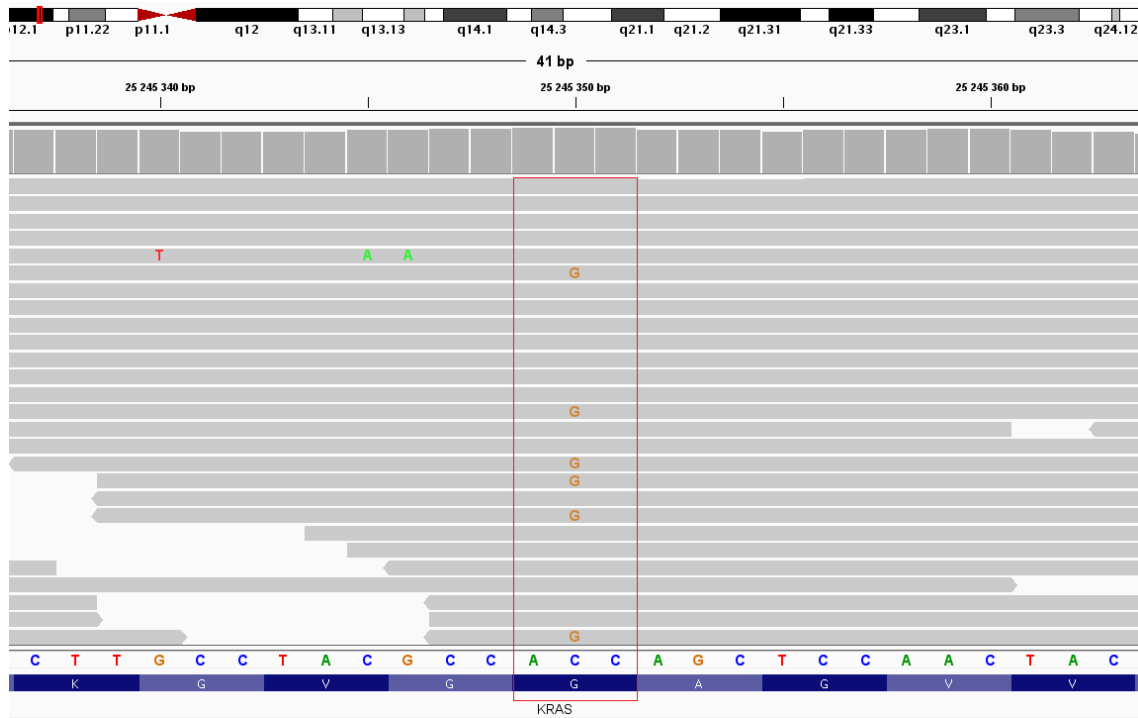

d

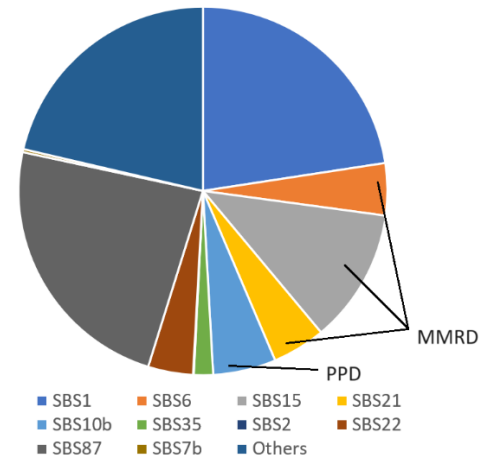

**Supplementary Figure 6: Computational tomography, histopathology, and molecular diagnostics in Patient's 1 colorectal carcinoma**

- a) Computational tomography (CT) at the time of diagnosis of bifocal anaplastic colorectal carcinoma and at the end of the disease.
- b) Hematoxylin-eosin staining showing well-to-moderately differentiated colorectal adenocarcinoma growing into the muscularis propria. Magnification 50x, scale bar 100  $\mu\text{m}$ .
- c) *KRAS* c.35G>C/p.G12A mutation identified by whole exome sequencing visualized in The Integrative Genomics Viewer tool (13).
- d) Mutational signatures analysis: Signatures single base substitution (SBS) 6, SBS15 and SBS21 associated with mismatch repair deficiency (MMRD) were identified in the tumor. SBS10b associated with polymerase proofreading deficiency (PPD) was also identified as the result of pathogenic *POLE* mutation.

### Supplementary data references

1. Das A, Sudhaman S, Morgenstern D, Coblenz A, Chung J, et al. Genomic predictors of response to PD-1 inhibition in children with germline DNA replication repair deficiency. *Nat Med.* 2022 Jan;28(1):125–35.
2. Warren RL, Choe G, Freeman DJ, Castellarin M, Munro S, et al. Derivation of HLA types from shotgun sequence datasets. *Genome Med.* 2012;4(12):95.
3. Nariai N, Kojima K, Saito S, Mimori T, Sato Y, et al. HLA-VBSeq: accurate HLA typing at full resolution from whole-genome sequencing data. *BMC Genomics.* 2015;16 Suppl 2(Suppl 2):S7.
4. Iafolla MAJ, Yang C, Chandran V, Pintilie M, Li Q, et al. Predicting Toxicity and Response to Pembrolizumab Through Germline Genomic HLA Class 1 Analysis. *JNCI Cancer Spectr.* 2021 Feb;5(1):pkaa115.
5. Bjerregaard AM, Nielsen M, Hadrup SR, Szallasi Z, et al. MuPeXI: prediction of neo-epitopes from tumor sequencing data. *Cancer Immunol Immunother.* 2017 Sep;66(9):1123–30.
6. Jurtz V, Paul S, Andreatta M, Marcatili P, Peters B, et al. NetMHCpan-4.0: Improved Peptide-MHC Class I Interaction Predictions Integrating Eluted Ligand and Peptide Binding Affinity Data. *J Immunol.* 2017 Nov 1;199(9):3360–8.
7. Maruvka YE, Mouw KW, Karlic R, Parasuraman P, Kamburov A, et al. Analysis of somatic microsatellite indels identifies driver events in human tumors. *Nat Biotechnol.* 2017 Oct;35(10):951–9.
8. McLaren W, Gil L, Hunt SE, Riat HS, Ritchie GRS, et al. The Ensembl Variant Effect Predictor. *Genome Biol.* 2016 Jun 6;17(1):122.
9. Yuan Y, Qin H, Li H, Shi W, Bao L, et al. The Functional Roles of ISG15/ISGylation in Cancer. *Molecules.* 2023 Jan 31;28(3):1337.
10. Worst BC, van Tilburg CM, Balasubramanian GP, Fiesel P, Witt R, et al. Next-generation personalised medicine for high-risk paediatric cancer patients - The INFORM pilot study. *Eur J Cancer.* 2016 Sep;65:91–101.
11. Wang C, Zhang J, Yin J, Gan Y, Xu S, et al. Alternative approaches to target Myc for cancer treatment. *Signal Transduct Target Ther.* 2021 Mar 10;6(1):117.
12. Yuan X, Larsson C, Xu D. Mechanisms underlying the activation of TERT transcription and telomerase activity in human cancer: old actors and new players. *Oncogene.* 2019 Aug;38(34):6172–83.
13. Robinson JT, Thorvaldsdóttir H, Winckler W, Guttman M, Lander ES, et al. Integrative Genomics Viewer. *Nat Biotechnol.* 2011 Jan;29(1):24–6.
